# Supplementary material for: Screening and optimization of phage display cyclic peptides against the WDR5 WBM site
Source: Royal Society of Chemistry journal article supplement (doi:10.1039/d3md00288h), 2023-01-01
Supplement: d3md00288h1.pdf [file d3md00288h1.pdf]

Electronic Supplementary Material (ESI) for RSC Medicinal Chemistry.  
This journal is © The Royal Society of Chemistry 2023

## Supporting Information

### Screen and Optimization of Phage Display Cyclic Peptides Against WDR5 WBM Site

Lingyu Song,<sup>a,b</sup> Jiawen Cao,<sup>a,b</sup> Lin Chen,<sup>b</sup> Zhiyan Du,<sup>b</sup> Naixia Zhang,<sup>a,c</sup> Danyan Cao\*<sup>b</sup> and Bing Xiong\*<sup>a,b,d</sup>

---

<sup>a</sup> Department of College of Pharmacy, University of Chinese Academy of Sciences, 19A Yuquan Road, Beijing 100049, China.

Email: bxiong@simm.ac.cn (B. Xiong); caody@simm.ac.cn (D. Cao); s20-songlingyu@simm.ac.cn (L. Song)

<sup>b</sup> Department of Medicinal Chemistry, Shanghai Institute of Materia Medica, Chinese Academy of Sciences, 555 Zuchongzhi Road, Shanghai 201203, China

<sup>c</sup> Department of Analytical Chemistry, Shanghai Institute of Materia Medica, Chinese Academy of Sciences, 555 Zuchongzhi Road, Shanghai 201203, China

<sup>d</sup> State Key Laboratory of Chemical Biology, Shanghai Institute of Materia Medica, Chinese Academy of Sciences, 555 Zuchongzhi Road, Shanghai 201203, China

# Table of Contents

|                                                                                                                                          |    |
|------------------------------------------------------------------------------------------------------------------------------------------|----|
| <b>Table S1.</b> Phage titer and recovery efficiency of three rounds in the biopanning .....                                             | 1  |
| <b>Table S2.</b> The peptide sequences derived from the third round in the subtractive panning .....                                     | 3  |
| <b>Table S3.</b> The peptide sequences derived from the third round in the alternant panning .....                                       | 4  |
| <b>Table S4.</b> Purify and molecular weight of cyclization products with 9 different chemical linkers .....                             | 5  |
| <b>Table S5.</b> The HPLC gradient elution condition.....                                                                                | 6  |
| <b>Figure S1.</b> The characterization of purified his-tagged WDR5 .....                                                                 | 7  |
| <b>Figure S2.</b> Phage-displayed cyclic peptide sequences picked from the third round of biopanning ....                                | 8  |
| <b>Figure S3.</b> Binding affinity derived from HTRF assay of the positive control peptide SV-10. ....                                   | 9  |
| <b>Figure S4.</b> HPLC chromatogram and LC-MS spectrum of the cyclic peptide CYC3 .....                                                  | 10 |
| <b>Figure S5.</b> HPLC chromatogram and LC-MS spectrum of the cyclic peptide CYC4.....                                                   | 11 |
| <b>Figure S6.</b> HPLC chromatogram and LC-MS spectrum of the cyclic peptide CYC7 .....                                                  | 12 |
| <b>Figure S7.</b> The analysis certification of the synthetic peptide DH226015 .....                                                     | 13 |
| <b>Figure S8.</b> The analysis certification of the synthetic peptide D210012 .....                                                      | 14 |
| <b>Figure S9.</b> The analysis certification of the synthetic peptide D210014 .....                                                      | 15 |
| <b>Figure S10.</b> The analysis certification of the synthetic peptide DH226016 .....                                                    | 16 |
| <b>Figure S11.</b> The analysis certification of the synthetic peptide DH210901 .....                                                    | 17 |
| <b>Figure S12.</b> The analysis certification of the synthetic peptide DH226027 .....                                                    | 18 |
| <b>Figure S13.</b> The analysis certification of the synthetic peptide DH226027-L.....                                                   | 19 |
| <b>Table S1.</b> Phage titer and recovery efficiency of three rounds in the biopanning; recovery efficiency = output titer / input titer |    |

| Round                                                         | Input Titer (pfu)    | Output Titer (pfu) | Recovery Efficiency   | Fold Increase |
|---------------------------------------------------------------|----------------------|--------------------|-----------------------|---------------|
| <b>Subtractive panning with Ni-NTA magnetic agarose beads</b> |                      |                    |                       |               |
| <b>1</b>                                                      | $1.0 \times 10^{11}$ | $1.0 \times 10^4$  | $1.0 \times 10^{-7}$  | 1             |
| <b>2</b>                                                      | $2.0 \times 10^{11}$ | $7.0 \times 10^4$  | $3.5 \times 10^{-7}$  | 3.5           |
| <b>3</b>                                                      | $2.0 \times 10^{11}$ | $1.0 \times 10^4$  | $0.5 \times 10^{-7}$  | 0.5           |
| <b>Alternant panning with two kinds of magnetic beads</b>     |                      |                    |                       |               |
| <b>1</b>                                                      | $1.0 \times 10^{11}$ | $2.0 \times 10^6$  | $2.0 \times 10^{-3}$  | 1             |
| <b>2</b>                                                      | $2.0 \times 10^{11}$ | $4.0 \times 10^5$  | $2.0 \times 10^{-4}$  | 0.1           |
| <b>3</b>                                                      | $2.0 \times 10^{11}$ | $2.5 \times 10^8$  | $1.25 \times 10^{-1}$ | 62.5          |

**Table S2.** The peptide sequences derived from the third round in the subtractive panning; \*: the sequence with an affinity value lower than -21.0

| No. | Peptide Sequence  | Reads (Sanger) | PSBinder (SAROTUP) | Affinity (ADCP) |
|-----|-------------------|----------------|--------------------|-----------------|
| A1  | CAHQRWVTC         | 4/33           | 0.93               | -               |
| A2  | CPWQVHRDC         | 3/33           | 0.53               | error           |
| A3  | <b>*CADTNWLVC</b> | 2/33           | 0.52               | <b>-22.7</b>    |
| A4  | CSSNTVPAC         | 2/33           | 0.04               | -19.6           |
| A5  | CPWKTHQSC         | 2/33           | 0.17               | error           |
| A6  | CSEARWMRC         | 2/33           | 0.12               | -20.2           |
| A7  | <b>*CSQAWWYQC</b> | 1/33           | 0.24               | <b>-22.7</b>    |
| A8  | CPWKVHSYC         | 1/33           | 0.81               | -               |
| A9  | <b>*CPNQWKSYC</b> | 1/33           | 0.27               | <b>-22.0</b>    |
| A10 | CNNLNAILC         | 1/33           | 0.08               | -20.2           |
| A11 | <b>*CFLNVSNAC</b> | 1/33           | 0.25               | <b>-21.1</b>    |
| A12 | CDMPPTQKC         | 1/33           | 0.55               | -19.7           |
| A13 | CWHAGRWTC         | 1/33           | 0.78               | -               |
| A14 | CLPNDHLRC         | 1/33           | 0.20               | error           |
| A15 | CGSSRWLEC         | 1/33           | 0.79               | -               |

**Table S3.** The peptide sequences derived from the third round in the alternant panning; \*: the sequence with an affinity value lower than -21.0

| No. | Peptide Sequence  | Reads (Sanger) | PSBinder (SAROTUP) | Affinity (ADCP) |
|-----|-------------------|----------------|--------------------|-----------------|
| B1  | <b>*CGSLDWPHC</b> | 5/124          | 0.69               | <b>-22.8</b>    |
| B2  | CMTPNPTTC         | 2/124          | 0.35               | -17.2           |
| B3  | CRAYDFPSC         | 2/124          | 0.97               | -               |
| B4  | CDARGGLRC         | 2/124          | 0.37               | -20.2           |
| B5  | CRVYEWPKC         | 1/124          | 0.98               | -               |
| B6  | CRALPFNTC         | 1/124          | 0.34               | -18.6           |
| B7  | CRVLPYGSC         | 1/124          | 0.94               | -               |
| B8  | CRVHPVGEC         | 1/124          | 0.97               | -               |
| B9  | CRDKPSNVC         | 1/124          | 0.21               | -18.7           |
| B10 | CGTNPIKKC         | 1/124          | 0.27               | -17.9           |
| B11 | CGSNTTVEC         | 1/124          | 0.57               | -20.6           |
| B12 | CSSNTVPAC         | 1/124          | 0.04               | -19.6           |
| B13 | CVSTATNGC         | 1/124          | 0.39               | -19.1           |
| B14 | <b>*CNSLNWFWC</b> | 1/124          | 0.30               | <b>-22.2</b>    |
| B15 | CSKKNPSWC         | 1/124          | 0.25               | -19.1           |
| B16 | CYGLSNSRC         | 1/124          | 0.40               | -19.9           |
| B17 | <b>*CGEGEADVC</b> | 1/124          | 0.50               | <b>-22</b>      |
| B18 | CAIGETSTC         | 1/124          | 0.89               | -               |
| B19 | CLNVSSPTC         | 1/124          | 0.10               | -18.3           |
| B20 | CNNPAQPWC         | 1/124          | 0.19               | -17.8           |
| B21 | CEPRSLANC         | 1/124          | 0.10               | -19.2           |
| B22 | CNWRLSNYC         | 1/124          | 0.18               | error           |
| B23 | CMNEDKFHC         | 1/124          | 0.53               | error           |
| B24 | CTGPWIWHC         | 1/124          | 0.96               | -               |
| B25 | CVNSMTPC          | 1/124          | 0.04               | error           |
| B26 | CINNLPKSC         | 1/124          | 0.12               | -19.1           |
| B27 | CFPNVYHAC         | 1/124          | 0.24               | error           |
| B28 | CSRSMMMAC         | 1/124          | 0.34               | -18.6           |
| B29 | CHMYHNATC         | 1/124          | 0.00               | error           |
| B30 | CHLTHQASC         | 1/124          | 0.00               | error           |

**Table S4.** Purify and molecular weight of cyclization products with 9 different chemical linkers

| <b>Product</b> | <b>Purify</b> | <b>Theoretical M.W.</b> | <b>Calculated M.W.</b> | <b>Observed [M+H]<sup>+</sup></b> | <b>Intensity</b> |
|----------------|---------------|-------------------------|------------------------|-----------------------------------|------------------|
| CYC1           | -             | 1273.50                 | 1274.50                | 1274.59                           | 1.87E+08         |
| CYC2           | -             | 1273.50                 | 1274.50                | 1274.52                           | 4.51E+07         |
| <b>CYC3</b>    | 92.90%        | 1273.50                 | 1274.50                | 1274.53                           | 2.43E+06         |
| <b>CYC4</b>    | 80.98%        | 1223.49                 | 1224.49                | 1224.58                           | 5.74E+06         |
| CYC5           | -             | 1225.47                 | 1226.47                | 1294.37                           | 8.03E+06         |
| CYC6           | -             | 1264.44                 | 1265.44                | 1462.38                           | 8.17E+06         |
| <b>CYC7</b>    | 89.00%        | 1274.50                 | 1275.50                | 1275.56                           | 4.91E+06         |
| CYC8           | -             | 1269.47                 | 1270.47                | 1170.51                           | 1.59E+08         |
| CYC9           | -             | 1223.49                 | 1224.49                | 1170.60                           | 5.70E+07         |

**Table S5.** The HPLC gradient elution condition

| <b>Time (min)</b> | <b>Mobile Phase A (%)</b> | <b>Mobile Phase B (%)</b> |
|-------------------|---------------------------|---------------------------|
| 0.0               | 20.0                      | 80.0                      |
| 2.0               | 95.0                      | 5.0                       |
| 5.0               | 60.0                      | 40.0                      |
| 6.5               | 5.0                       | 95.0                      |
| 8.0               | 5.0                       | 95.0                      |
| 8.5               | 95.0                      | 5.0                       |

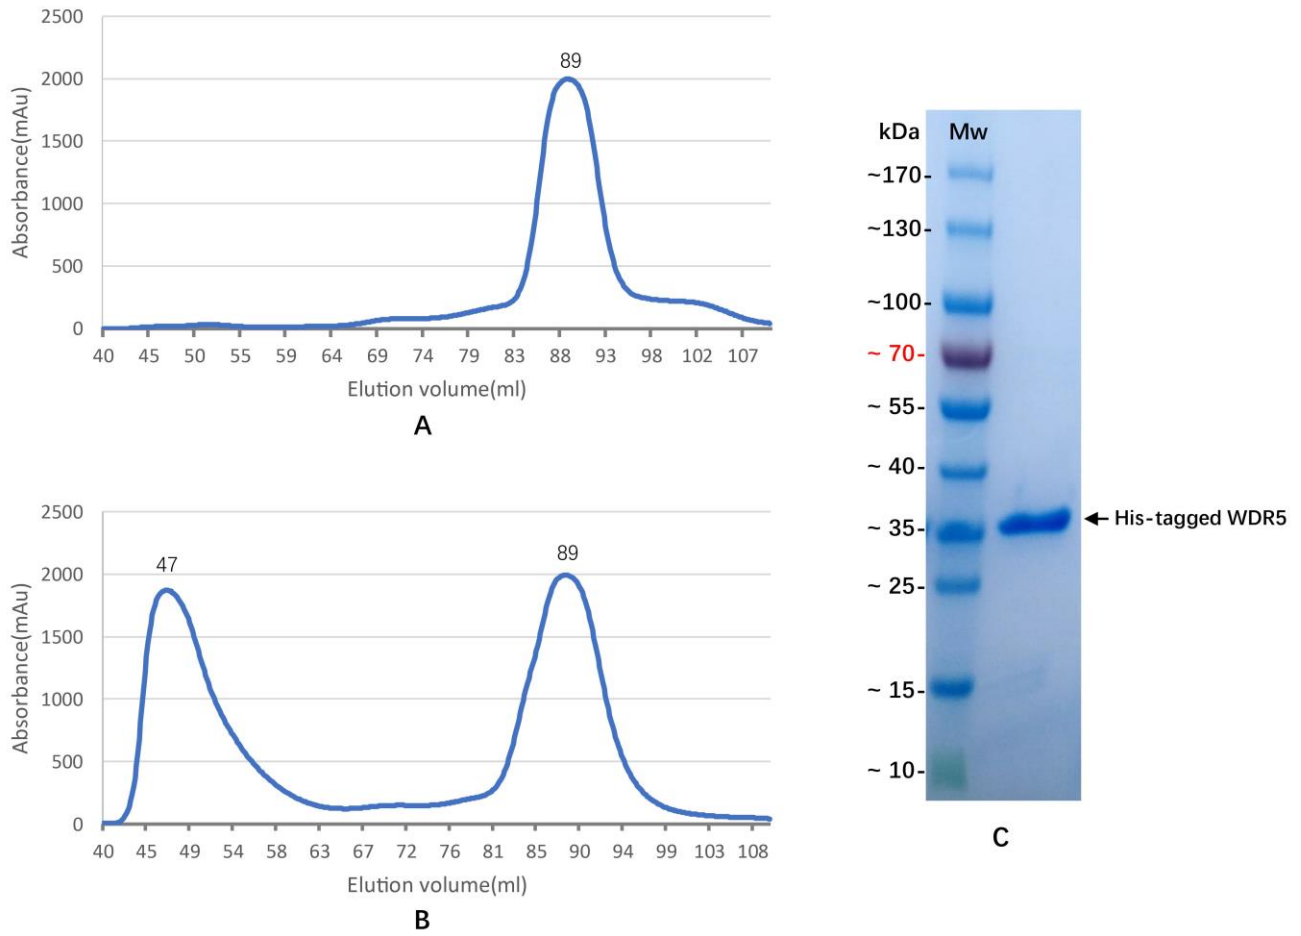

**Figure S1.** The characterization of purified his-tagged WDR5. (A) Gel-filtration chromatogram of his-tagged WDR5 with a single peak at 89 ml. (B) The elution volume of aggregated WDR5 at 47 ml. (C) SDS-PAGE of purified his-tagged WDR5 protein migrating above the band 35.0 kDa.



A

|    |            |
|----|------------|
| 1  | CADTNWLVC  |
| 2  | CADTNWLVC  |
| 3  | CSSNTVPAC  |
| 4  | CSSNTVPAC  |
| 5  | CSQAWWYQC  |
| 6  | CPWKTHQSC  |
| 7  | CPWKTHQSC  |
| 8  | CPWKVHSYC  |
| 9  | CPNQWKSVC  |
| 10 | CNNLNAILC  |
| 11 | CFLNVSNAAC |
| 12 | CDMPPTQKC  |
| 13 | CPWQVHRDC  |
| 14 | CPWQVHRDC  |
| 15 | CPWQVHRDC  |
| 16 | CAHQRWVTC  |
| 17 | CAHQRWVTC  |
| 18 | CAHQRWVTC  |
| 19 | CAHQRWVTC  |
| 20 | CSEARWMRC  |
| 21 | CSEARWMRC  |
| 22 | CGSSRWLEAC |
| 23 | CWHAGRWTAC |
| 24 | CLPNDHLRC  |
| 25 | CRTLPHYKWC |
| 26 | CRTLPHYKWC |
| 27 | CRTLPHYKWC |
| 28 | CRTLPHYKWC |
| 29 | CRTLPHYKWC |
| 30 | CRTLPHYKWC |
| 31 | CRTLPHYKWC |
| 32 | CRTIPYNNC  |
| 33 | CRTIPYNNC  |

B

|    |             |    |            |     |             |
|----|-------------|----|------------|-----|-------------|
| 1  | CGSLDWPHC   | 42 | CRTIPFPTC  | 83  | CRTLPHYQGC  |
| 2  | CGSLDWPHC   | 43 | CRTIPFPTC  | 84  | CRTLPHYWGC  |
| 3  | CGSLDWPHC   | 44 | CRTIPFPTC  | 85  | CRTMPWDFC   |
| 4  | CGSLDWPHC   | 45 | CRTIPFPHC  | 86  | CRTLPMWTC   |
| 5  | CGSLDWPHC   | 46 | CRTLPFPEC  | 87  | CRTLPMWTC   |
| 6  | CHLTHQASC   | 47 | CRTLFPFDC  | 88  | CRTLPMWQC   |
| 7  | CSRSMMMAC   | 48 | CRTLPPFFC  | 89  | CRTLPMWMC   |
| 8  | CHMYHNATC   | 49 | CRTWPFPTC  | 90  | CRTLPHNMC   |
| 9  | CMTNPPTTC   | 50 | CRTQPFPC   | 91  | CRTLPHNMC   |
| 10 | CMTNPPTTC   | 51 | CRTQPFPC   | 92  | CRTLPHNEC   |
| 11 | CRAYDFPSC   | 52 | CRTQPFPC   | 93  | CRTLPHGAC   |
| 12 | CRAYDFPSC   | 53 | CRTLPFNTC  | 94  | CRTLPHGAC   |
| 13 | CDARGGLRC   | 54 | CRTLPFNTC  | 95  | CRTLPHYGVC  |
| 14 | CDARGGLRC   | 55 | CRTLPFNTC  | 96  | CRTLPHYGLC  |
| 15 | CRVYEWPKC   | 56 | CRTLPFNTC  | 97  | CRTMPMSLC   |
| 16 | CRALPFNTC   | 57 | CRTLPLFTC  | 98  | CRTLPMGLC   |
| 17 | CRVLPYGSC   | 58 | CRTVPFNLC  | 99  | CRTMPVGTAC  |
| 18 | CRVHPVGEAC  | 59 | CRTLPTFTC  | 100 | CRTMPVGTAC  |
| 19 | CRDKPSNVC   | 60 | CRTLPTFTC  | 101 | CRTLPIGTAC  |
| 20 | CGTNP I KKC | 61 | CRTLPHYTSC | 102 | CRTLPLMTC   |
| 21 | CGSNTTVEAC  | 62 | CRTVPFGQC  | 103 | CRTPEFMHC   |
| 22 | CSSNTVPAC   | 63 | CRTLPHGSC  | 104 | CRTPEFMHC   |
| 23 | CVSTATNGC   | 64 | CRTLPHGSC  | 105 | CRTAPFMHC   |
| 24 | CNSLNWFWC   | 65 | CRTLPHFAC  | 106 | CRTAPFMHC   |
| 25 | CSKKNPSWC   | 66 | CRTLPHFIAC | 107 | CRTVPYMHAC  |
| 26 | CYGLSNSRC   | 67 | CRTLPHYHIC | 108 | CRTQPHYLYC  |
| 27 | CGEGEADVAC  | 68 | CRTLPHYHAC | 109 | CRTQPFPLYC  |
| 28 | CAI GETSTC  | 69 | CRTLPHYHAC | 110 | CRTVPHMYC   |
| 29 | CLNVSSPTC   | 70 | CRTLPHFEC  | 111 | CRTHPYEYAC  |
| 30 | CNNPAQPWC   | 71 | CRTLPHYLQC | 112 | CRTMPNMAC   |
| 31 | CEPRSLANAC  | 72 | CRTLPHYFEC | 113 | CRTVPLQQC   |
| 32 | CVNSMTYPC   | 73 | CRTLPHYTYC | 114 | CRTTPLMQC   |
| 33 | CNWRLSNYC   | 74 | CRTMPYKQC  | 115 | CRTPELMKAC  |
| 34 | CMNEDKFHC   | 75 | CRTLPHYRDC | 116 | CRTQPIYEC   |
| 35 | CTGPWIWHAC  | 76 | CRTMPYMNAC | 117 | CRTLPHVKEAC |
| 36 | CFPNVYHAC   | 77 | CRTVPHYLSC | 118 | CRTPEVKLAC  |
| 37 | CINNLPKSC   | 78 | CRTVPHYMSC | 119 | CRTMEYWRAC  |
| 38 | CRTGSAWSC   | 79 | CRTVPHYMSC | 120 | CRTLQYMSC   |
| 39 | CRTYEFPKC   | 80 | CRTVPHYMSC | 121 | CRTLQYMSC   |
| 40 | CRTHVWPQC   | 81 | CRTVPHYPGC | 122 | CRTVAYMKAC  |
| 41 | CRTLTI NQC  | 82 | CRTLPHYLGC | 123 | CRTLEFSVAC  |
|    |             |    |            | 124 | CRTVEMEAC   |

**Figure S2.** Phage-displayed cyclic peptide sequences picked from the third round of biopanning; numbers of the enriched sequences are marked by green colour. (A) 33 sequences picked from the subtractive panning with Ni-NTA magnetic agarose beads. (B) 124 sequences picked from the alternant panning with two kinds of magnetic beads.

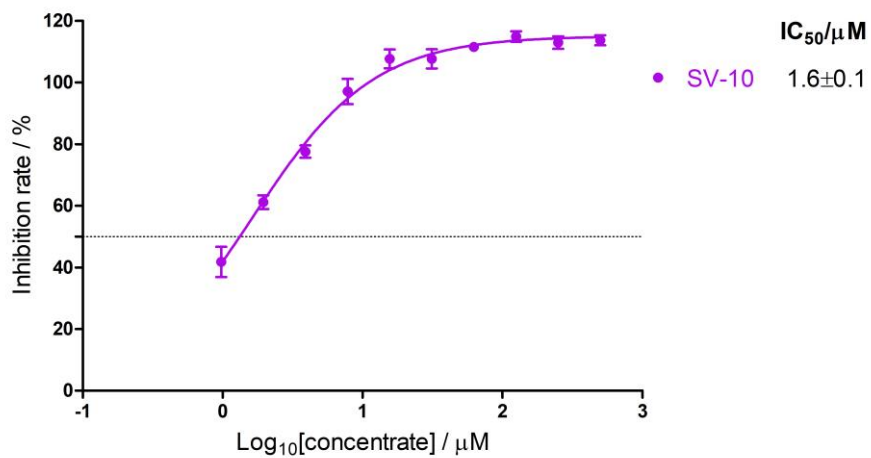

**Figure S3.** Binding affinity derived from HTRF assay of the positive control peptide SV-10.

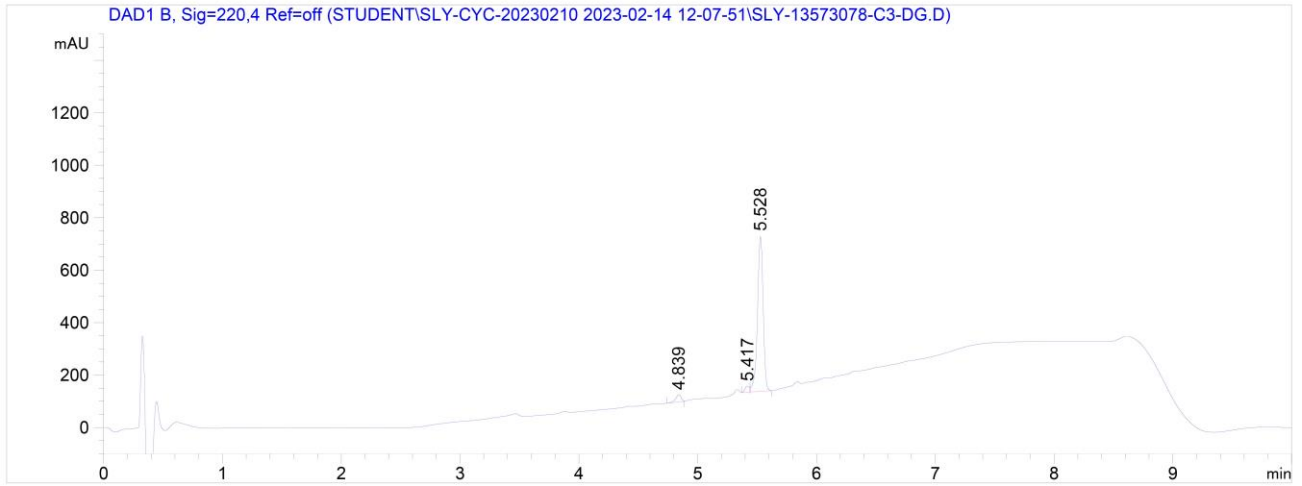

Sorted By : Signal  
Multiplier : 1.0000  
Dilution : 1.0000  
Do not use Multiplier & Dilution Factor with ISTDs

Signal 1: DAD1 B, Sig=220,4 Ref=off

| Peak # | RetTime [min] | Type | Width [min] | Area [mAU*s] | Height [mAU] | Area %  |
|--------|---------------|------|-------------|--------------|--------------|---------|
| 1      | 4.839         | BV   | 0.0502      | 90.97682     | 27.81858     | 4.2903  |
| 2      | 5.417         | BV   | 0.0398      | 59.60685     | 23.37117     | 2.8109  |
| 3      | 5.528         | VB   | 0.0528      | 1969.94543   | 592.72156    | 92.8988 |

Totals : 2120.52910 643.91131

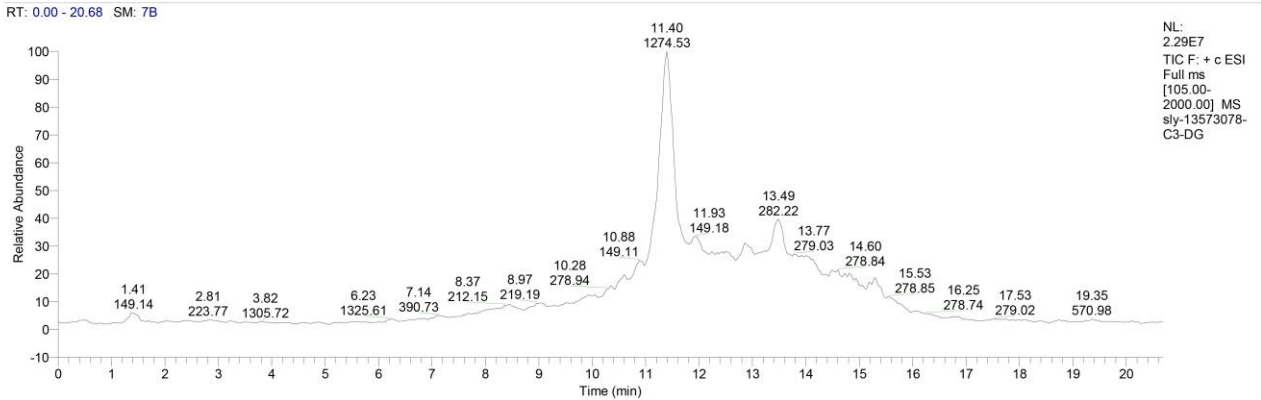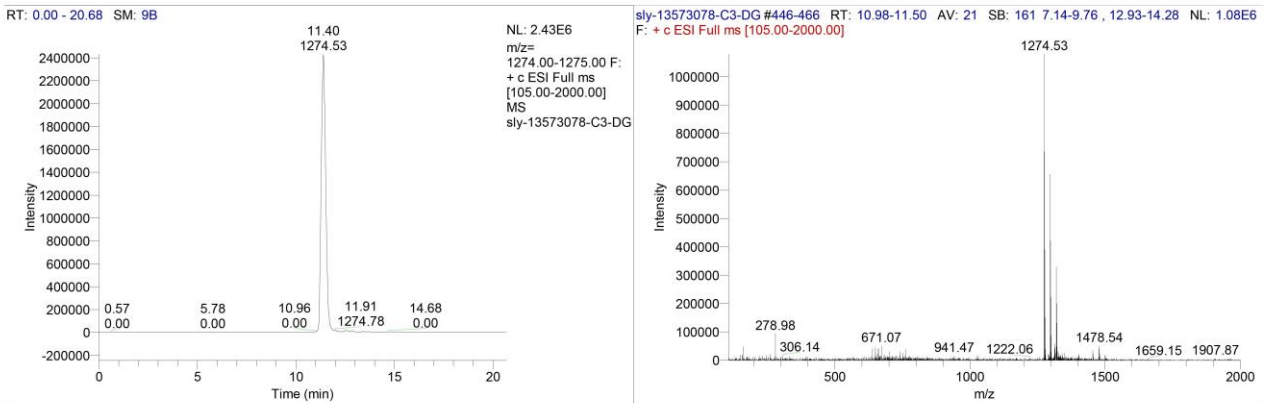

Figure S4. HPLC chromatogram and LC-MS spectrum of the cyclic peptide CYC3.

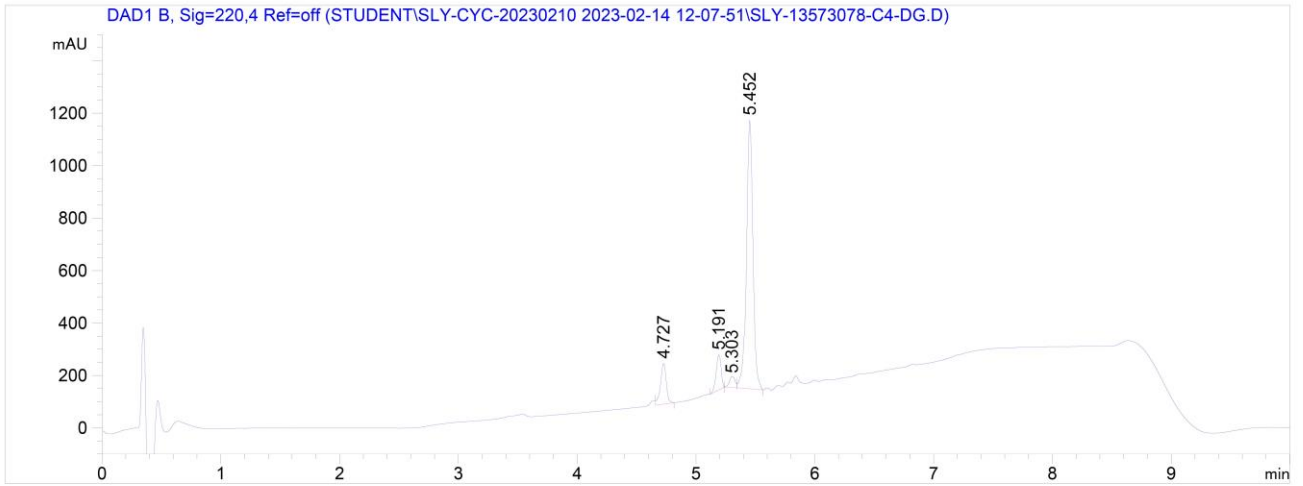

Sorted By : Signal  
Multiplier : 1.0000  
Dilution : 1.0000  
Do not use Multiplier & Dilution Factor with ISTDs

Signal 1: DAD1 B, Sig=220,4 Ref=off

| Peak # | RetTime [min] | Type | Width [min] | Area [mAU*s] | Height [mAU] | Area %  |
|--------|---------------|------|-------------|--------------|--------------|---------|
| 1      | 4.727         | VB   | 0.0518      | 529.92902    | 155.30937    | 9.6381  |
| 2      | 5.191         | BB   | 0.0483      | 393.48483    | 133.93102    | 7.1565  |
| 3      | 5.303         | BV   | 0.0436      | 122.17971    | 42.40127     | 2.2221  |
| 4      | 5.452         | VB   | 0.0554      | 3636.68530   | 1024.22913   | 80.9833 |

Totals : 4682.27886 1355.97079

RT: 0.00 - 20.70 SM: 7B

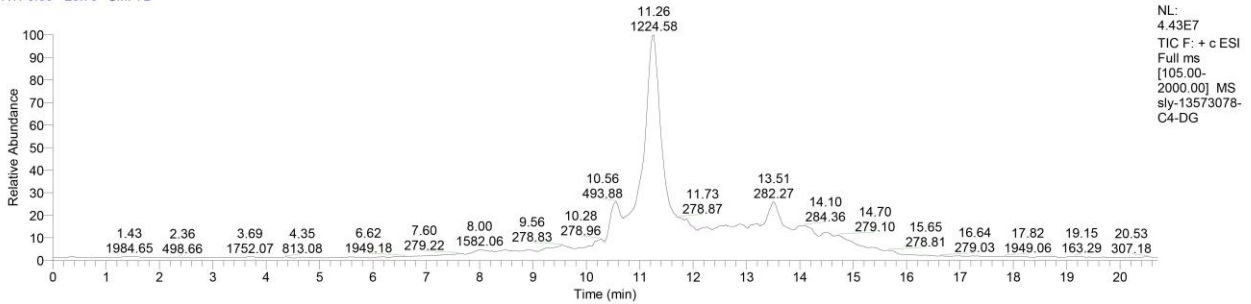

NL: 4.43E7  
TIC F: + c ESI  
Full ms [105.00-2000.00] MS  
sly-13573078-C4-DG

RT: 0.00 - 20.70 SM: 9B

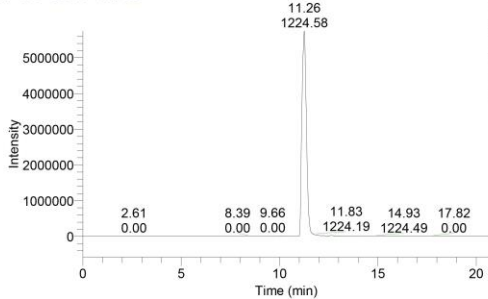

NL: 5.74E6  
m/z= 1224.00-1225.00 F:  
+ c ESI Full ms [105.00-2000.00]  
MS  
sly-13573078-C4-DG

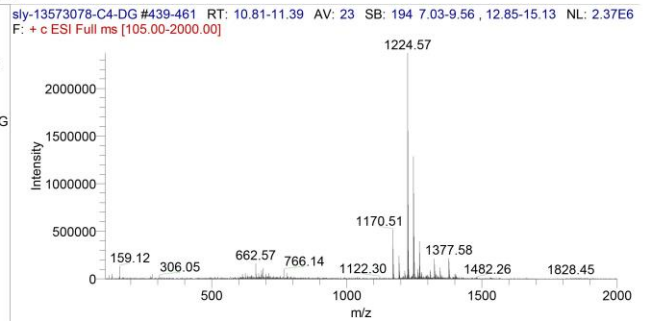

Figure S5. HPLC chromatogram and LC-MS spectrum of the cyclic peptide CYC4.

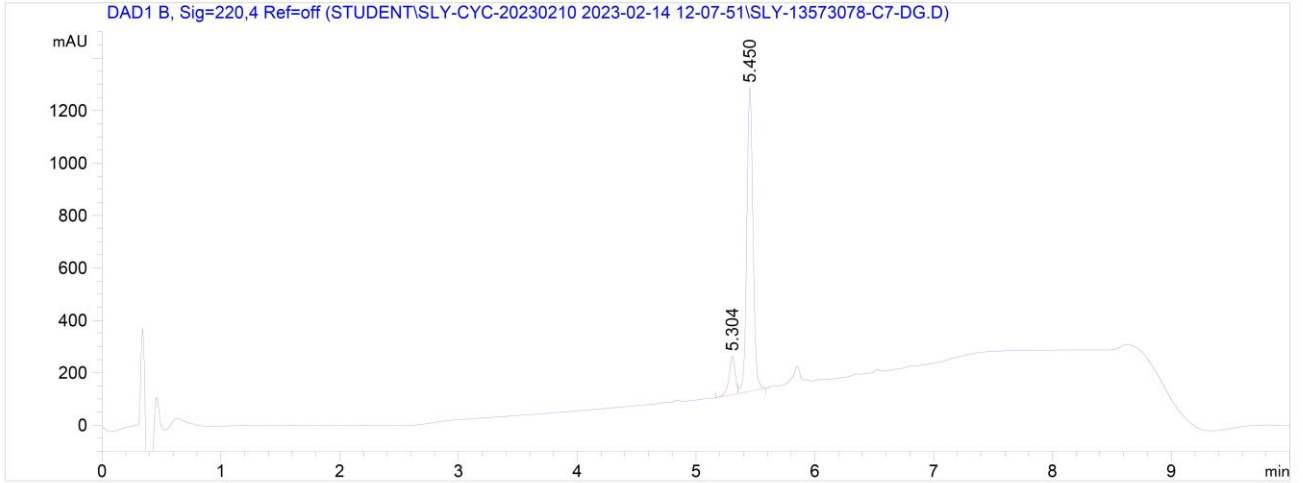

Sorted By : Signal  
Multiplier : 1.0000  
Dilution : 1.0000  
Do not use Multiplier & Dilution Factor with ISTDs

Signal 1: DAD1 B, Sig=220,4 Ref=off

| Peak # | RetTime [min] | Type | Width [min] | Area [mAU*s] | Height [mAU] | Area %  |
|--------|---------------|------|-------------|--------------|--------------|---------|
| 1      | 5.304         | BV   | 0.0530      | 515.54413    | 146.57593    | 10.9983 |
| 2      | 5.450         | VB   | 0.0560      | 4171.96240   | 1158.47620   | 89.0017 |

Totals : 4687.50653 1305.05212

RT: 0.00 - 20.69 SM: 7B

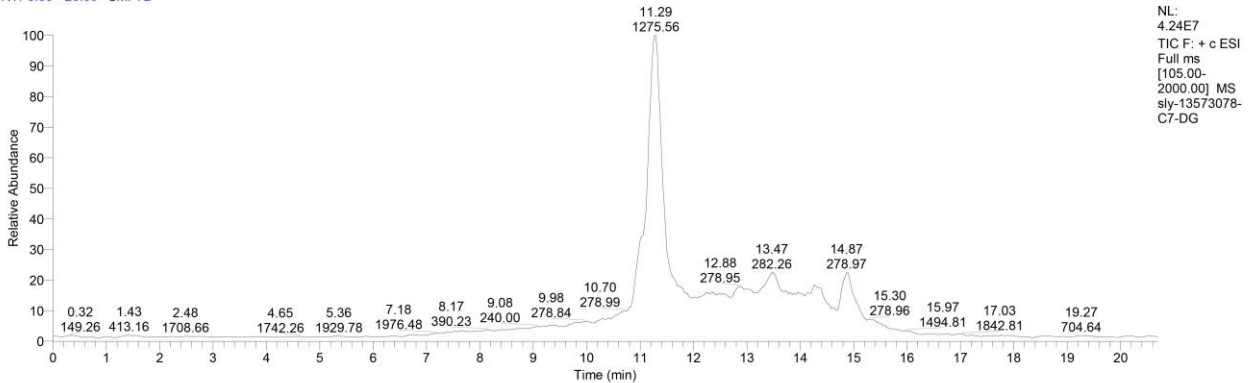

RT: 0.00 - 20.69 SM: 9B

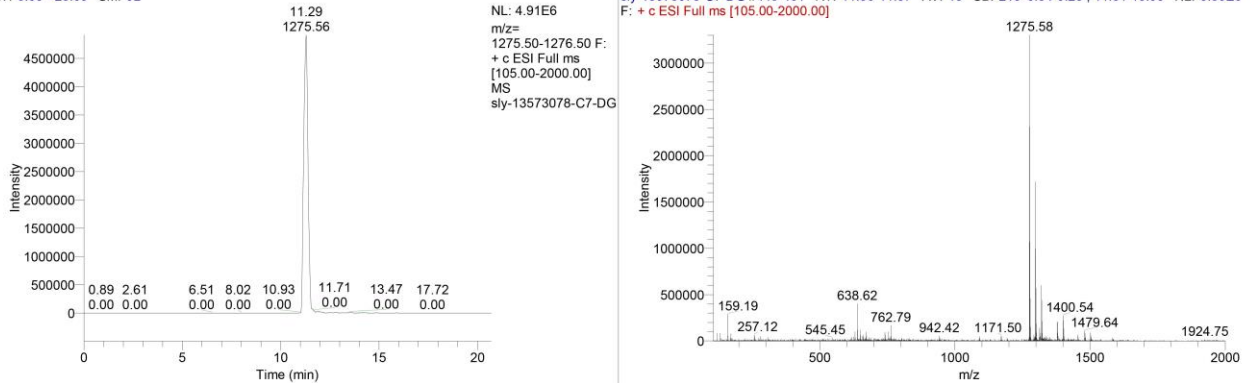

Figure S6. HPLC chromatogram and LC-MS spectrum of the cyclic peptide CYC7.

产品名称:  
 Peptide Name: Custom Peptide  
 订单编号:  
 Purchase order number: DH226015  
 批号:  
 Lot Number: B-06-1005  
 多肽序列:  
 Sequence: H-Cys-Ala-Asp-Thr-Asn-Trp-Leu-Val-Cys-OH (Cys&Cys bridge)  
 分子量:  
 Molecular Weight (daltons): 1022.17  
 纯度:  
 Final Purity (HPLC %): 96.5%  
 产品重量:  
 Amount Supplied: 4 mg  
 产品外观: 白色冻干粉  
 Appearance: White lyophilized powder  
 储存条件: 长期储存 Long Term: -20°C  
 Storage Conditions: 短期储存 Short Term: 4°C

Chromatogram

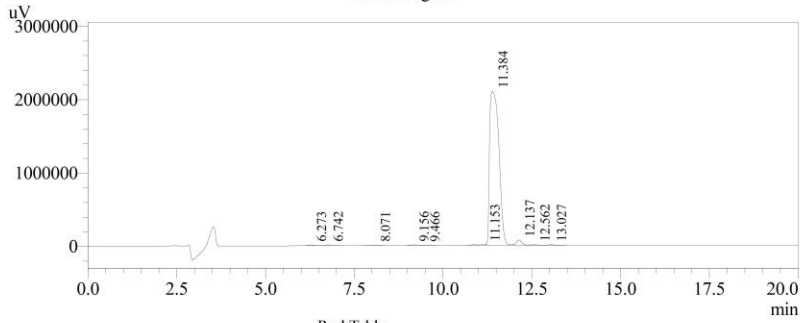

PeakTable

| Peak# | Ret. Time | Area     | Height  | Area %  | Height % |
|-------|-----------|----------|---------|---------|----------|
| 1     | 6.273     | 78470    | 7265    | 0.197   | 0.327    |
| 2     | 6.742     | 61991    | 7093    | 0.156   | 0.319    |
| 3     | 8.071     | 50498    | 4607    | 0.127   | 0.207    |
| 4     | 9.156     | 54310    | 5946    | 0.137   | 0.267    |
| 5     | 9.466     | 24090    | 2487    | 0.061   | 0.112    |
| 6     | 11.153    | 178661   | 10682   | 0.449   | 0.480    |
| 7     | 11.384    | 38383568 | 2098752 | 96.570  | 94.339   |
| 8     | 12.137    | 738204   | 71198   | 1.857   | 3.200    |
| 9     | 12.562    | 91685    | 8386    | 0.231   | 0.377    |
| 10    | 13.027    | 85431    | 8272    | 0.215   | 0.372    |
| Total |           | 39746908 | 2224690 | 100.000 | 100.000  |

MS Spectrum

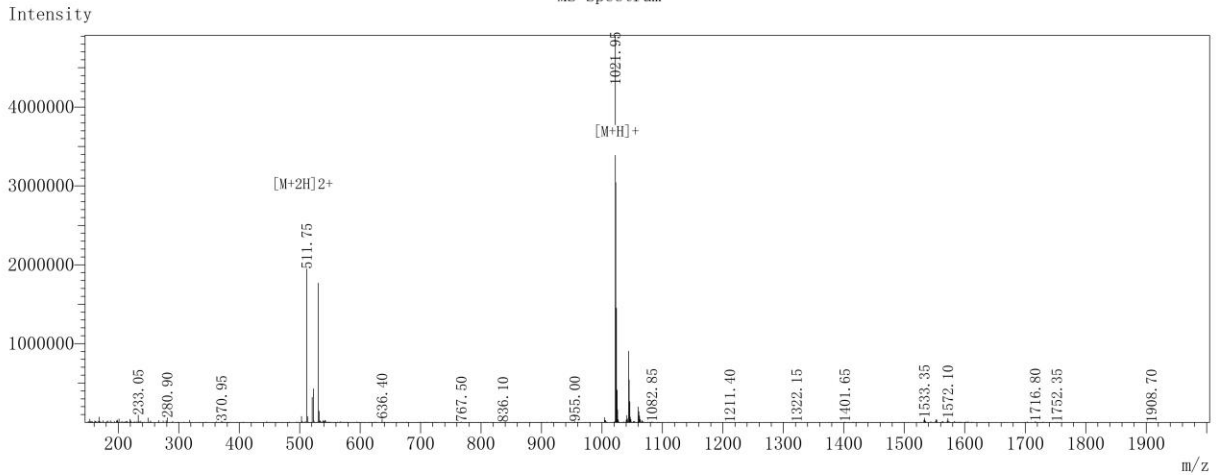

Sample Information  
 Dissolution method :0.1mg sample dissolved to  
 50%ACN and 50%H2O  
 Date Acquired :2022/07/11 12:08:17  
 Injection Volume :1ul  
 Name DH226015  
 Sequence :CADTNWLVC  
 Modification :C-C  
 Lot No. B-06-1005  
 Theoretical :1022.17  
 bserved  
 Interface :ESI  
 Nebulizing Gas Flow :1.50L  
 CDL Temp :250°C  
 CDL Volt  
 Block Temp :200  
 Prerod Bias :+4.5kv  
 Detector :-0.2kv  
 T.Flow :0.2ml/min  
 B. conc :50%H2O/50%MeOH

Figure S7. The analysis certification of the synthetic peptide DH226015.

产品名称:  
 Peptide Name: Custom Peptide  
 订单编号:  
 Purchase order number: D210012  
 批号:  
 Lot Number: FM-02-0004  
 多肽序列:  
 Sequence: H-Cys-Pro-Asn-Gln-Trp-Lys-Ser-Tyr-Cys-OH (Cys&Cys bridge)  
 分子量:  
 Molecular Weight (daltons): 1126.3  
 纯度:  
 Final Purity (HPLC %): 99.4%  
 产品重量:  
 Amount Supplied: 5 mg  
 产品外观: 白色冻干粉  
 Appearance: White lyophilized powder  
 储存条件: 长期储存 Long Term: -20℃  
 Storage Conditions: 短期储存 Short Term: 2℃~8℃

Chromatogram

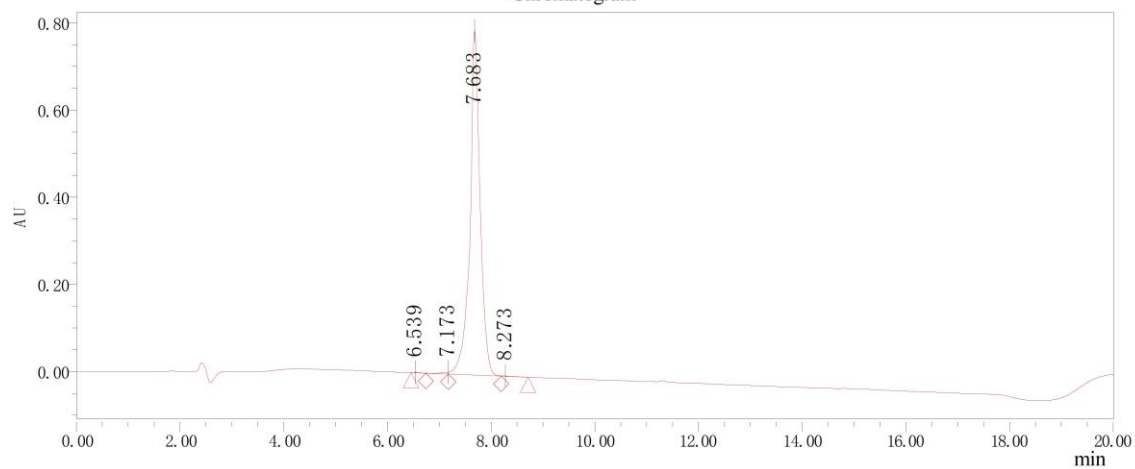

PeakTable

| 名称 | 保留时间 (分钟) | % 面积  | 面积 (微伏*秒) | 高度 (微伏) |
|----|-----------|-------|-----------|---------|
| 1  | 6.539     | 0.08  | 8271      | 991     |
| 2  | 7.173     | 0.40  | 43341     | 4174    |
| 3  | 7.683     | 99.41 | 10778724  | 790266  |
| 4  | 8.273     | 0.12  | 12626     | 1022    |

MS Spectrum

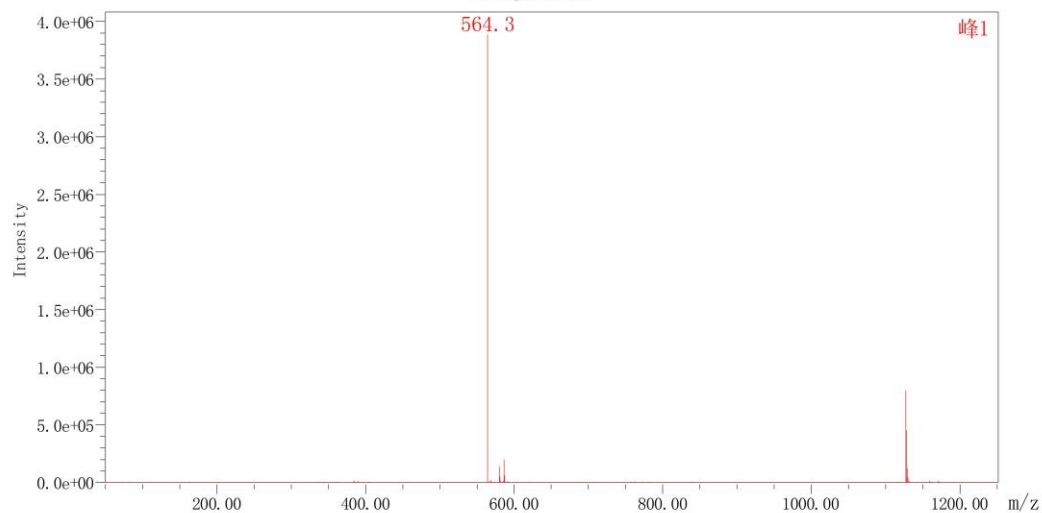

名称 峰1 保留时间 1.038 基础峰 564.30 样品名称 D210012

Figure S8. The analysis certification of the synthetic peptide D210012.

产品名称:  
 Peptide Name: Custom Peptide  
 订单编号:  
 Purchase order number: D210014  
 批号:  
 Lot Number: FM-02-0006  
 多肽序列:  
 Sequence: H-Cys-Ser-Gln-Ala-Trp-Trp-Tyr-Gln-Cys-OH (Cys&Cys bridge)  
 分子量:  
 Molecular Weight (daltons): 1172.3  
 纯度:  
 Final Purity (HPLC %): 97.6%  
 产品重量:  
 Amount Supplied: 5 mg  
 产品外观: 白色冻干粉  
 Appearance: White lyophilized powder  
 储存条件: 长期储存 Long Term: -20℃  
 Storage Conditions: 短期储存 Short Term: 2℃-8℃

Chromatogram

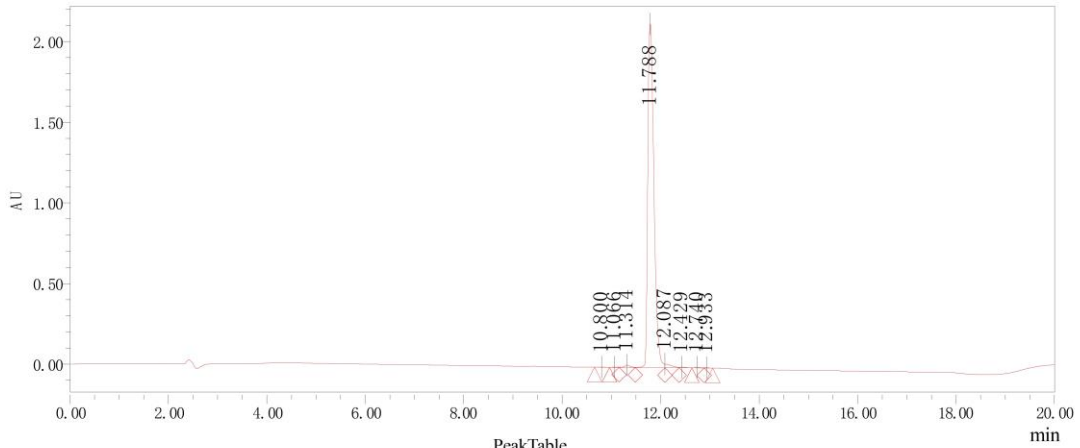

Peak Table

| 名称 | 保留时间 (分钟) | % 面积  | 面积 (微伏秒) | 高度 (微伏) |
|----|-----------|-------|----------|---------|
| 1  | 10.800    | 0.05  | 9177     | 1166    |
| 2  | 11.066    | 0.10  | 18632    | 2786    |
| 3  | 11.314    | 0.60  | 113501   | 14223   |
| 4  | 11.788    | 97.60 | 18338575 | 2133439 |
| 5  | 12.087    | 1.13  | 212043   | 22559   |
| 6  | 12.429    | 0.21  | 39204    | 4744    |
| 7  | 12.740    | 0.22  | 42201    | 5523    |
| 8  | 12.933    | 0.09  | 16340    | 2891    |

MS Spectrum

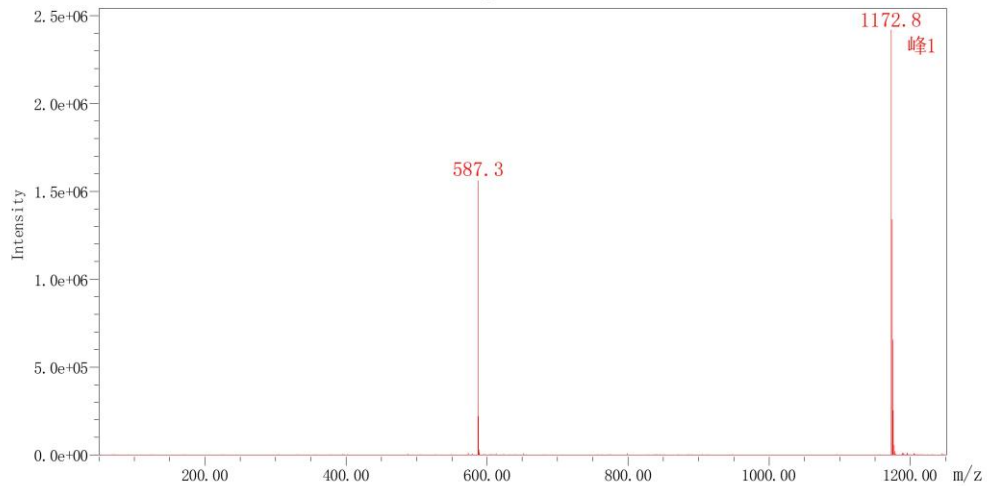

名称 峰1 保留时间 2.736 基础峰 1172.76 样品名称 D210014

Figure S9. The analysis certification of the synthetic peptide D210014.



产品名称:  
 Peptide Name: Custom Peptide  
 订单编号:  
 Purchase order number: DH226016  
 批号:  
 Lot Number: B-06-1006  
 多肽序列:  
 Sequence: H-Cys-Phe-Leu-Asn-Val-Ser-Asn-Ala-Cys-OH (Cys&Cys bridge)  
 分子量:  
 Molecular Weight (daltons): 968.12  
 纯度:  
 Final Purity (HPLC %): 96.5%  
 产品重量:  
 Amount Supplied: 4 mg  
 产品外观: 白色冻干粉  
 Appearance: White lyophilized powder  
 储存条件: 长期储存 Long Term: -20℃  
 Storage Conditions: 短期储存 Short Term: 4℃

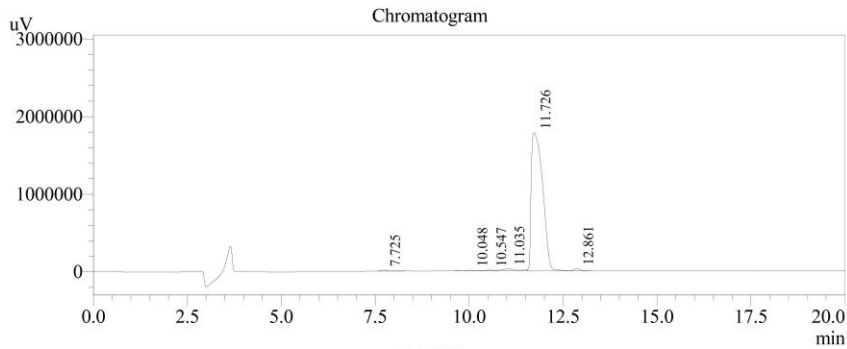

PeakTable

| Peak# | Ret. Time | Area     | Height  | Area %  | Height % |
|-------|-----------|----------|---------|---------|----------|
| 1     | 7.725     | 120552   | 13117   | 0.311   | 0.705    |
| 2     | 10.048    | 121709   | 6672    | 0.314   | 0.359    |
| 3     | 10.547    | 155555   | 8858    | 0.402   | 0.476    |
| 4     | 11.035    | 628262   | 25598   | 1.623   | 1.376    |
| 5     | 11.726    | 37382307 | 1779461 | 96.572  | 95.672   |
| 6     | 12.861    | 300689   | 26248   | 0.777   | 1.411    |
| Total |           | 38709075 | 1859956 | 100.000 | 100.000  |

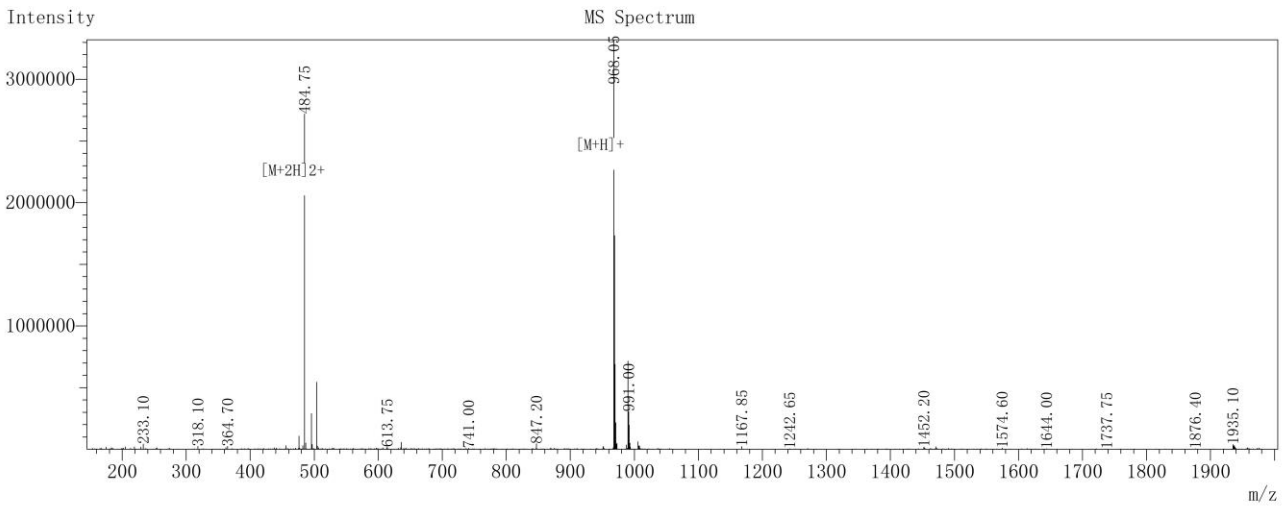

Sample Information: Interface :ESI  
 Dissolution method :0.1mg sample dissolved in 50%ACN and 50%H2O  
 Date Acquired :2022/07/12 16:38:23  
 Injection Volume :1ul  
 Name :DH226016  
 Sequence :CFLNVSAC  
 Modification :C-C  
 Lot No. :B-06-1006  
 Theoretical Weight :968.125  
 Interface :ESI  
 Nebulizing Gas Flow :1.50L  
 CDL Temp :250℃  
 CDL Volt :  
 Block Temp :200  
 Prerod Bias :+4  
 Detector :  
 T. Flow :0.2ml/min  
 B. conc :50%H2O/50%MeOH

Figure S10. The analysis certification of the synthetic peptide DH226016.

产品名称:  
 Peptide Name: Custom Peptide  
 订单编号:  
 Purchase order number: DH210901  
 批号:  
 Lot Number: A-09-1001  
 多肽序列:  
 Sequence: H-Cys-Gly-Ser-Leu-Asp-Trp-Pro-His-Cys-OH (Cys&Cys bridge)  
 分子量:  
 Molecular Weight (daltons): 1015.14  
 纯度:  
 Final Purity (HPLC %): 95.4%  
 产品重量:  
 Amount Supplied: 5 mg  
 产品外观: 白色冻干粉  
 Appearance: White lyophilized powder  
 储存条件: 长期储存 Long Term: -20℃  
 Storage Conditions: 短期储存 Short Term: 4℃

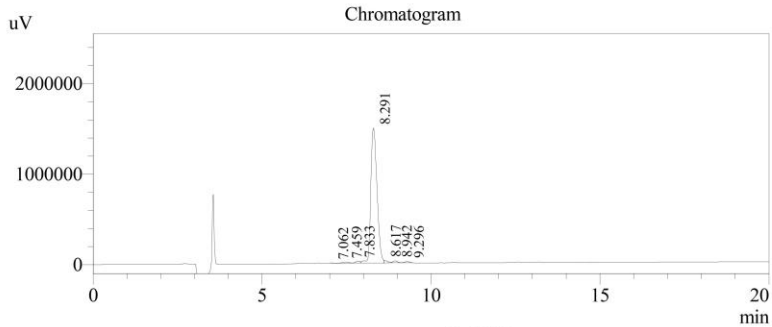

Peak Table

| Peak# | Ret. Time | Area     | Height  | Area %  | Height % |
|-------|-----------|----------|---------|---------|----------|
| 1     | 7.062     | 7656     | 1792    | 0.039   | 0.113    |
| 2     | 7.459     | 174838   | 12325   | 0.880   | 0.776    |
| 3     | 7.833     | 188577   | 21560   | 0.949   | 1.358    |
| 4     | 8.291     | 18978190 | 1490478 | 95.475  | 93.887   |
| 5     | 8.617     | 198911   | 26678   | 1.001   | 1.681    |
| 6     | 8.942     | 201543   | 21990   | 1.014   | 1.385    |
| 7     | 9.296     | 127843   | 12693   | 0.643   | 0.800    |
| Total |           | 19877557 | 1587516 | 100.000 | 100.000  |

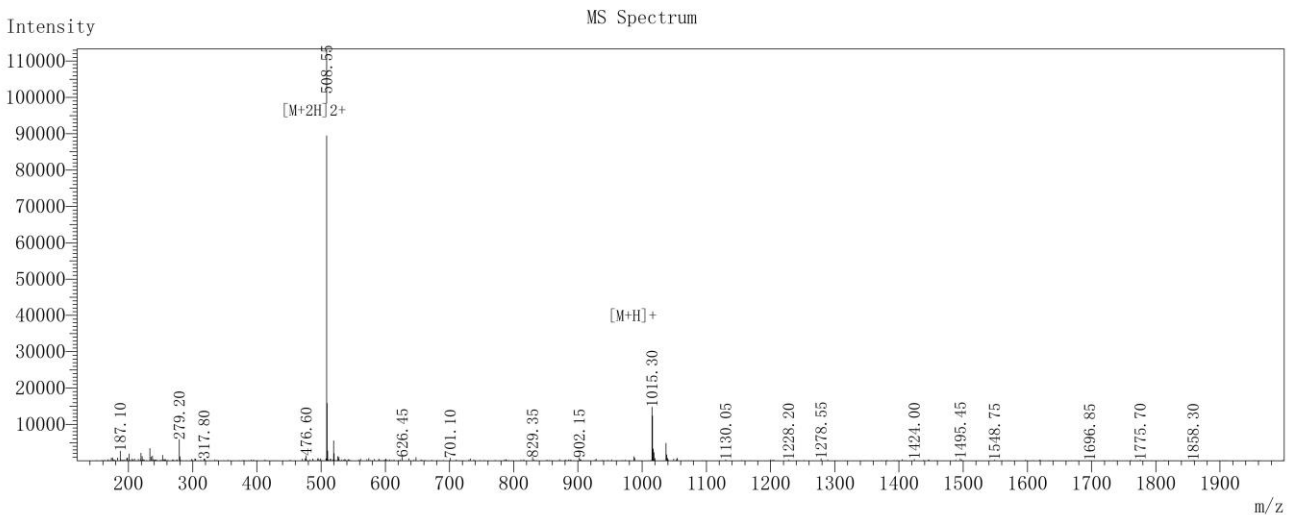

|                    |                            |                     |             |          |                 |
|--------------------|----------------------------|---------------------|-------------|----------|-----------------|
| Sample Information | Interface                  | :ESI                | Prerod Bias | :+4.5kv  |                 |
| Dissolution method | :0.1mg sample dissolved to | Nebulizing Gas Flow | :1.50L      | Detector | : -0.2kv        |
|                    | 100%H2O                    | CDL Temp            | :250℃       | T. Flow  | :0.2ml/min      |
| Date Acquired      | :2021/10/12 11:22:03       | CDL Volt            |             | B. conc  | :50%H2O/50%MeOH |
| Injection Volume   | :1ul                       | Block Temp          | :200        |          |                 |
| Name               | DH2109Q1                   |                     |             |          |                 |
| Sequence           | :CGSLDWPFC                 |                     |             |          |                 |
| Modification       | :C-C                       |                     |             |          |                 |
| Lot No.            | A-09-1001                  |                     |             |          |                 |
| Theoretical        | :1015.14                   |                     |             |          |                 |
| bserved            |                            |                     |             |          |                 |

Figure S11. The analysis certification of the synthetic peptide DH210901.

产品名称:  
 Peptide Name: Custom Peptide  
 订单编号:  
 Purchase order number: DH226027  
 批号:  
 Lot Number: B-08-1009  
 多肽序列:  
 Sequence: H-Cys-Asn-Ser-Leu-Asn-Trp-Phe-Trp-Cys-OH (Cys&Cys bridge)  
 分子量:  
 Molecular Weight (daltons): 1170.33  
 纯度:  
 Final Purity (HPLC %): 98.0%  
 产品重量:  
 Amount Supplied: 4 mg  
 产品外观: 白色冻干粉  
 Appearance: White lyophilized powder  
 储存条件: 长期储存 Long Term: -20℃  
 Storage Conditions: 短期储存 Short Term: 4℃

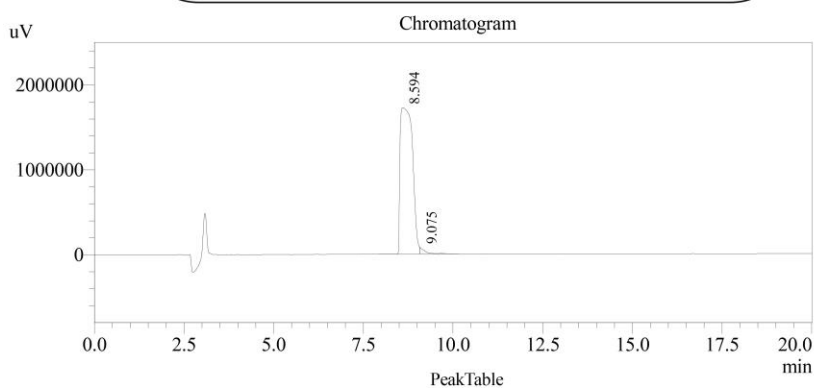

Detector A Ch1 214nm

| Peak# | Ret. Time | Area     | Height  | Area %  | Height % |
|-------|-----------|----------|---------|---------|----------|
| 1     | 8.594     | 41260202 | 1723087 | 98.077  | 95.775   |
| 2     | 9.075     | 808972   | 76020   | 1.923   | 4.225    |
| Total |           | 42069174 | 1799107 | 100.000 | 100.000  |

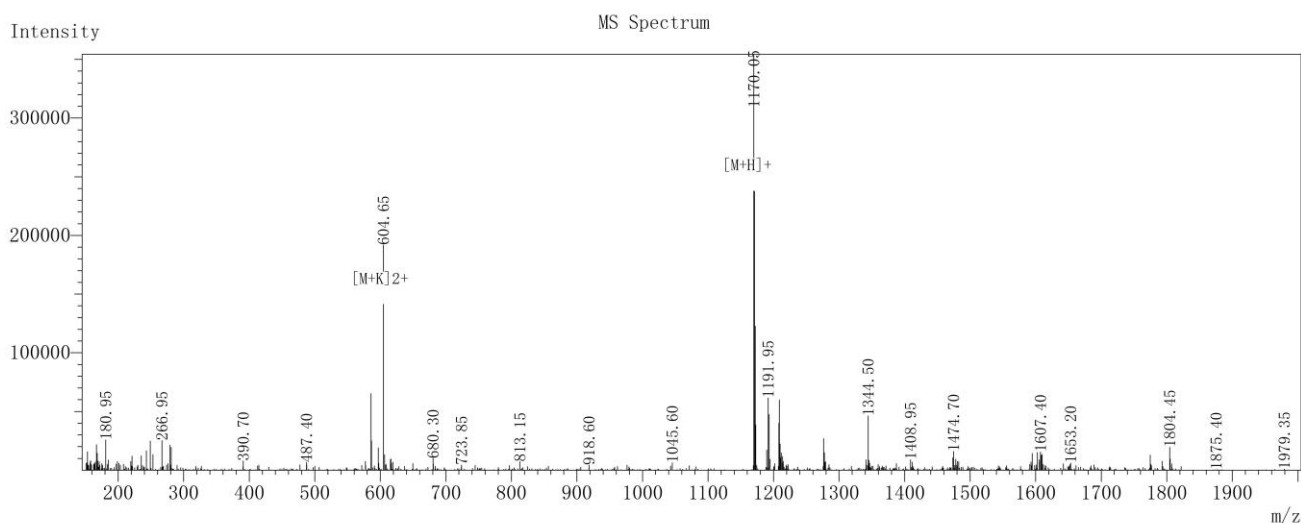

Sample Information  
 Dissolution method :0.1mg sample dissolved to  
 50%ACN and 50%H2O  
 Date Acquired :2022/08/04 09:44:11  
 Injection Volume :1ul  
 Name DH226027  
 Sequence :CNLSLWFWC  
 Modification :C-C  
 Lot No. B-08-1009  
 Theoretical :1170.339  
 bserved

Interface :ESI  
 Nebulizing Gas Flow :1.50L  
 CDL Temp :250℃  
 CDL Volt  
 Block Temp :200

Prerod Bias :+4.5kv  
 Detector :-0.2kv  
 I. Flow :0.2ml/min  
 B. conc :50%H2O/50%MeOH

**Figure S12.** The analysis certification of the synthetic peptide DH226027.

产品名称:  
 Peptide Name: Custom Peptide  
 订单编号:  
 Purchase order number: DH226027-L  
 批号:  
 Lot Number: A-11-1001  
 多肽序列:  
 Sequence: H-Cys-Gly-Ser-Leu-Asp-Trp-Pro-His-Cys-OH  
 分子量:  
 Molecular Weight (daltons): 1017.14  
 纯度:  
 Final Purity (HPLC %): 99.4%  
 产品重量:  
 Amount Supplied: 100 mg  
 产品外观: 白色冻干粉  
 Appearance: White lyophilized powder  
 储存条件: 长期储存 Long Term: -20°C  
 Storage Conditions: 短期储存 Short Term: 4°C

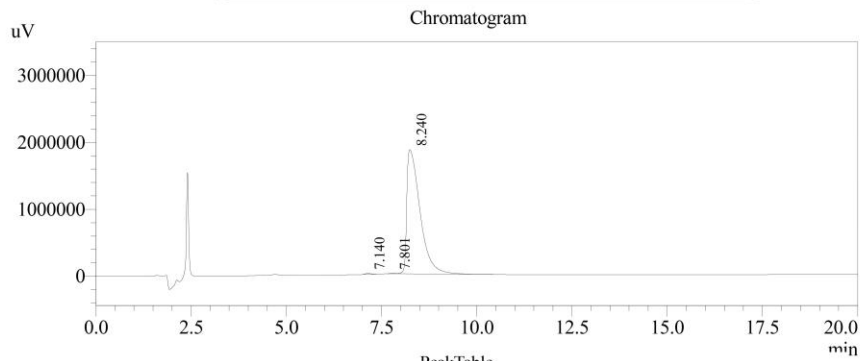

Detector A Ch1 214nm

| Peak# | Ret. Time | Area     | Height  | Area %  | Height % |
|-------|-----------|----------|---------|---------|----------|
| 1     | 7.140     | 159618   | 14896   | 0.353   | 0.792    |
| 2     | 7.801     | 85460    | 7775    | 0.189   | 0.413    |
| 3     | 8.240     | 44915414 | 1857742 | 99.457  | 98.794   |
| Total |           | 45160492 | 1880413 | 100.000 | 100.000  |

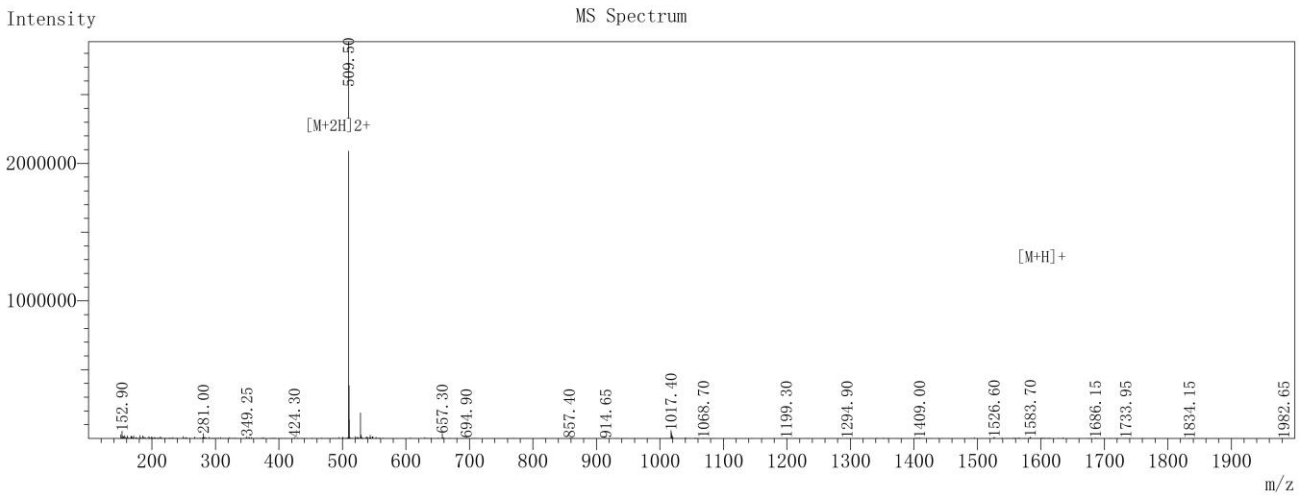

Sample Information: Interface : ESI  
 Dissolution method : 0.1mg sample dissolved in 100% H<sub>2</sub>O  
 Date Acquired : 2021/11/11 14:41:06  
 Injection Volume : 1ul  
 Name : DH226027-L  
 Sequence : CGSLDWPHC  
 Modification : N/A  
 Lot No. : A-11-1001  
 Theoretical : 1017.14  
 bserved :  
 Interface : ESI  
 Nebulizing Gas Flow : 1.50L  
 CDL Temp : 250°C  
 CDL Volt :  
 Block Temp : 200  
 Prerod Bias : +4  
 Detector :  
 T. Flow : 0.2ml/min  
 B. conc : 50%H<sub>2</sub>O/50%MeOH

**Figure S13.** The analysis certification of the synthetic peptide DH226027-L.
